# Supplementary material for: Derivation of the entropic formula for the statistical mechanics of space plasmas
Source: Copernicus journal article supplement (doi:10.5194/npg-2017-54), 2017-09-25
Supplement: Supplementary file [file npg-2017-54-AC1-supplement.pdf]

MS No.: npg-2017-54

Title: "Derivation of the entropic formula for the statistical mechanics of space plasmas"

Author: George Livadiotis

Respond to Referee #1

Thank you for your valuable comments that have improved the paper significantly. Thank you also for your good words, especially for finding the paper "very hot" and that it is very important and may become a cornerstone in this field. The revised version has been prepared by taking care all of your comments and corrections.

Together with this response, we have included a "track changes" version as well as a clean version of the revised manuscript. In the "track changes" version we mark all the changes-corrections in regards to the comments of all referees.

George Livadiotis
