# Supplementary material for: Derivation of the entropic formula for the statistical mechanics of space plasmas
Source: Copernicus journal article supplement (doi:10.5194/npg-2017-54), 2017-09-25
Supplement: Supplementary file [file npg-2017-54-AC3-supplement.pdf]

MS No.: npg-2017-54

Title: "Derivation of the entropic formula for the statistical mechanics of space plasmas"

Author: George Livadiotis

Respond to Referee #3

Thank you for your valuable comments that have improved this work. Thank you also for finding that definitely deserves publication. The revised version has been prepared by taking care all of your comments and corrections.

Together with this response, we have included a "track changes" version as well as a clean version of the revised manuscript. In the "track changes" version we mark all the changes-corrections in regards to all referees' comments.

George Livadiotis
